# Supplementary material
Source: MDPI journal article supplement (https://www.mdpi.com/2076-3417/13/2/853)
Supplement: s1 [file s1]

# Supporting Information

## Probing the Interactions of LRP1 Ectodomain Derived Peptides with Fibrillar Tau Protein and its Impact on Cellular Internalization

E. Josephine Boder<sup>1a§</sup>, Beatriz G. Goncalves<sup>1b§</sup>, Charlotta G. Lebedenko<sup>1c</sup>, and Ipsita A. Banerjee<sup>1\*</sup>

Fordham University, Department of Chemistry, 441 East Fordham Road, Bronx, New York 10458;

§: Equal Contributors.

\* Correspondence Email: banerjee@fordham.edu

**Table S1. Thread templates generated from Phyre 2 with 100% confidence level that were modeled to determine the cluster 2 subdomain structure of LRP1.**

| Number | Template | Confidence% | % i.d. | Template Information                                                                                                                                                                                                                                                                                                                      |
|--------|----------|-------------|--------|-------------------------------------------------------------------------------------------------------------------------------------------------------------------------------------------------------------------------------------------------------------------------------------------------------------------------------------------|
| 1      | cln7dA   | 100         | 36     | <b>PDB header:</b> lipid transport<br><b>Chain:</b> A: <b>PDB Molecule:</b> low-density lipoprotein receptor;<br><b>PDBTitle:</b> extracellular domain of the ldl receptor<br><b>PDB Entry:</b> <a href="#">PDBe</a> <a href="#">RCSB</a> <a href="#">PDBj</a>                                                                            |
| 2      | c3s94A   | 100         | 38     | <b>PDB header:</b> signaling protein<br><b>Chain:</b> A: <b>PDB Molecule:</b> low-density lipoprotein receptor-related protein 6;<br><b>PDBTitle:</b> crystal structure of lrp6-e1e2<br><b>PDB Entry:</b> <a href="#">PDBe</a> <a href="#">RCSB</a> <a href="#">PDBj</a>                                                                  |
| 3      | c3s8vA   | 100         | 33     | <b>PDB header:</b> signaling protein<br><b>Chain:</b> A: <b>PDB Molecule:</b> low-density lipoprotein receptor-related protein 6;<br><b>PDBTitle:</b> crystal structure of lrp6-dkk1 complex<br><b>PDB Entry:</b> <a href="#">PDBe</a> <a href="#">RCSB</a> <a href="#">PDBj</a>                                                          |
| 4      | c5b4xD   | 100         | 38     | <b>PDB header:</b> signaling protein/endocytosis<br><b>Chain:</b> D: <b>PDB Molecule:</b> low density lipoprotein receptor-related protein 8,<br><b>PDBTitle:</b> crystal structure of the apoer2 ectodomain in complex with the reelin2 r56 fragment<br><b>PDB Entry:</b> <a href="#">PDBe</a> <a href="#">RCSB</a> <a href="#">PDBj</a> |
| 5      | c3v65D   | 100         | 42     | <b>PDB header:</b> protein binding<br><b>Chain:</b> D: <b>PDB Molecule:</b> low-density lipoprotein receptor-related protein 4;<br><b>PDBTitle:</b> crystal structure of agrin and lrp4 complex<br><b>PDB Entry:</b> <a href="#">PDBe</a> <a href="#">RCSB</a> <a href="#">PDBj</a>                                                       |
| 6      | c6fb3A   | 100         | 14     | <b>PDB header:</b> cell adhesion<br><b>Chain:</b> A: <b>PDB Molecule:</b> teneurin-2;<br><b>PDBTitle:</b> teneurin 2 partial extracellular domain<br><b>PDB Entry:</b> <a href="#">PDBe</a> <a href="#">RCSB</a> <a href="#">PDBj</a>                                                                                                     |
| 7      | c3v64C   | 100         | 44     | <b>PDB header:</b> protein binding<br><b>Chain:</b> C: <b>PDB Molecule:</b> low-density lipoprotein receptor-related protein 4;<br><b>PDBTitle:</b> crystal structure of agrin and lrp4<br><b>PDB Entry:</b> <a href="#">PDBe</a> <a href="#">RCSB</a> <a href="#">PDBj</a>                                                               |
| 8      | c3m0cC   | 100         | 35     | <b>PDB header:</b> protein binding<br><b>Chain:</b> C: <b>PDB Molecule:</b> low-density lipoprotein receptor;<br><b>PDBTitle:</b> the x-ray crystal structure of pcsk9 in complex with the ldl receptor<br><b>PDB Entry:</b> <a href="#">PDBe</a> <a href="#">RCSB</a> <a href="#">PDBj</a>                                               |
| 9      | c3v65B   | 100         | 44     | <b>PDB header:</b> protein binding<br><b>Chain:</b> B: <b>PDB Molecule:</b> low-density lipoprotein receptor-related protein 4;                                                                                                                                                                                                           |

|    |         |      |    |                                                                                                                                                                                                                                                                                                                                                                                       |
|----|---------|------|----|---------------------------------------------------------------------------------------------------------------------------------------------------------------------------------------------------------------------------------------------------------------------------------------------------------------------------------------------------------------------------------------|
|    |         |      |    | <b>PDBTitle:</b> crystal structure of agrin and lrp4 complex<br><b>PDB Entry:</b> <a href="#">PDBe</a> <a href="#">RCSB</a> <a href="#">PDBj</a>                                                                                                                                                                                                                                      |
| 10 | c3p5cL  | 100  | 34 | <b>PDB header:</b> hydrolase/lipid binding protein<br><b>Chain:</b> L: <b>PDB Molecule:</b> low density lipoprotein receptor variant;<br><b>PDBTitle:</b> the structure of the ldlr/pcsk9 complex reveals the receptor in an2 extended conformation<br><b>PDB Entry:</b> <a href="#">PDBe</a> <a href="#">RCSB</a> <a href="#">PDBj</a>                                               |
| 11 | c6fayA  | 100  | 13 | <b>PDB header:</b> cell adhesion<br><b>Chain:</b> A: <b>PDB Molecule:</b> odz3 protein;<br><b>PDBTitle:</b> teneurin3 monomer<br><b>PDB Entry:</b> <a href="#">PDBe</a> <a href="#">RCSB</a> <a href="#">PDBj</a>                                                                                                                                                                     |
| 12 | c3p5bL  | 100  | 35 | <b>PDB header:</b> hydrolase/lipid binding protein<br><b>Chain:</b> L: <b>PDB Molecule:</b> low density lipoprotein receptor variant;<br><b>PDBTitle:</b> the structure of the ldlr/pcsk9 complex reveals the receptor in an2 extended conformation<br><b>PDB Entry:</b> <a href="#">PDBe</a> <a href="#">RCSB</a> <a href="#">PDBj</a>                                               |
| 13 | c7bamB  | 99.4 | 15 | <b>PDB header:</b> membrane protein<br><b>Chain:</b> B: <b>PDB Molecule:</b> teneurin-4;<br><b>PDBTitle:</b> human teneurin4 wt c2<br><b>PDB Entry:</b> <a href="#">PDBe</a> <a href="#">RCSB</a> <a href="#">PDBj</a>                                                                                                                                                                |
| 14 | C3soqA  | 100  | 40 | <b>PDB header:</b> protein binding/antagonist<br><b>Chain:</b> A: <b>PDB Molecule:</b> low-density lipoprotein receptor-related protein 6;<br><b>PDBTitle:</b> the structure of the first ywtd beta propeller domain of lrp6 in2 complex with a dkk1 peptide<br><b>PDB Entry:</b> <a href="#">PDBe</a> <a href="#">RCSB</a> <a href="#">PDBj</a>                                      |
| 15 | clijqA  | 100  | 36 | <b>PDB header:</b> lipid transport<br><b>Chain:</b> A: <b>PDB Molecule:</b> low-density lipoprotein receptor;<br><b>PDBTitle:</b> crystal structure of the ldl receptor ywtd-egf domain pair<br><b>PDB Entry:</b> <a href="#">PDBe</a> <a href="#">RCSB</a> <a href="#">PDBj</a>                                                                                                      |
| 16 | dlijqal | 100  | 35 | <b>Fold:</b> 6-bladed beta-propeller<br><b>Superfamily:</b> YWTD domain<br><b>Family:</b> YWTD domain<br><b>PDB entry:</b> <a href="#">PDBe</a> <a href="#">RCSB</a> <a href="#">PDBj</a>                                                                                                                                                                                             |
| 17 | dlnpea  | 100  | 35 | <b>Fold:</b> 6-bladed beta-propeller<br><b>Superfamily:</b> YWTD domain<br><b>Family:</b> YWTD domain<br><b>PDB entry:</b> <a href="#">PDBe</a> <a href="#">RCSB</a> <a href="#">PDBj</a>                                                                                                                                                                                             |
| 18 | c4a2lD  | 96.7 | 11 | <b>PDB header:</b> transcription<br><b>Chain:</b> D: <b>PDB Molecule:</b> two-component system sensor histidine kinase/response; <b>PDBTitle:</b> structure of the periplasmic domain of the heparin and heparan2 sulphate sensing hybrid two component system bt4663 in apo and3 ligand bound forms <b>PDB Entry:</b> <a href="#">PDBe</a> <a href="#">RCSB</a> <a href="#">PDBj</a> |
| 19 | c7djlC  | 99.9 | 20 | <b>PDB header:</b> plant protein<br><b>Chain:</b> C: <b>PDB Molecule:</b> protein suppressor of quenching 1, chloroplastic;<br><b>PDBTitle:</b> structure of four truncated and mutated forms of quenching protein<br><b>PDB Entry:</b> <a href="#">PDBe</a> <a href="#">RCSB</a> <a href="#">PDBj</a>                                                                                |
| 20 | c5a1vK  | 97.7 | 14 | <b>PDB header:</b> transport protein<br><b>Chain:</b> K: <b>PDB Molecule:</b> coatomer subunit alpha;<br><b>PDBTitle:</b> the structure of the copi coat linkage i<br><b>PDB Entry:</b> <a href="#">PDBe</a> <a href="#">RCSB</a> <a href="#">PDBj</a>                                                                                                                                |

**Table S2. Top template Threads obtained from I-TASSER studies to determine the secondary structures of the 23-amino acid sequence of Cluster II domain and the fourteen designed peptides.**

**1. Sequence: SKAWVCDGDND CEDNSDEENCES (23-amino acid sequence) derived from Cluster II domain of LRP1.**

IDEN is the percentage sequence identity in the structurally aligned region.

| Rank | PDB Hit               | I den1 | I den2 | Cov. | Norm. Z-Score | Sec. Struc. Seq<br>CCCSSCCCCCCCCCHHHCCC<br>SKAWVCDGDND CEDNSDEENCES |
|------|-----------------------|--------|--------|------|---------------|---------------------------------------------------------------------|
| 1    | <a href="#">1n7dA</a> | 0.50   | 0.39   | 0.78 | 0.38          | -----CDREYDCKDMSDEVGCVN                                             |
| 2    | <a href="#">7qbdD</a> | 0.57   | 0.52   | 0.91 | 2.16          | PLTWRCDRDLDCSDGSDEEEC--                                             |
| 3    | <a href="#">3t5oA</a> | 0.48   | 0.61   | 1.00 | 1.41          | ARKLECNGENDCGDN SDERDCGR                                            |
| 4    | <a href="#">4zrpC</a> | 0.48   | 0.48   | 1.00 | 3.92          | PLTWRCDGHPDCPDSSDELGCGT                                             |
| 5    | <a href="#">3t5oA</a> | 0.52   | 0.61   | 0.91 | 1.56          | -RKLECNGENDCGDN SDERDCG-                                            |
| 6    | <a href="#">1cr8A</a> | 0.57   | 0.56   | 1.00 | 0.70          | PLRWRCGDGTD C MDS SDEKSC EG                                         |
| 7    | <a href="#">3a7qB</a> | 0.52   | 0.48   | 0.91 | 2.27          | PSVWRCDEDDCLDH SDEDDC--                                             |
| 8    | <a href="#">7jpnH</a> | 0.09   | 0.22   | 1.00 | 0.39          | ASKGAAAEIREQGDGAED EEWDD                                            |
| 9    | <a href="#">1ajjA</a> | 0.59   | 0.56   | 0.96 | 2.97          | HSSWRC DGGPDCKDKSDEENCA-                                            |
| 10   | <a href="#">1cr8A</a> | 0.57   | 0.56   | 1.00 | 0.55          | PLRWRCGDGTD C MDS SDEKSC EG                                         |

**2. Sequence: SKAWVCDGDN (TauRP1-1)**

| Rank | PDB Hit               | I den1 | I den2 | Cov. | Norm. Z-Score | Sec. Struc. Seq<br>CCCSSCCCC<br>SKAWVCDGDN |
|------|-----------------------|--------|--------|------|---------------|--------------------------------------------|
| 1    | <a href="#">4zrpC</a> | 0.44   | 0.40   | 0.90 | 2.07          | -LTWRCDRDL                                 |
| 2    | <a href="#">1pvjA</a> | 0.50   | 0.60   | 0.80 | 1.06          | -HAFVIDGA-                                 |
| 3    | <a href="#">3a7qB</a> | 0.40   | 0.40   | 1.00 | 1.24          | PSVWRCDEDD                                 |
| 4    | <a href="#">6qxfK</a> | 0.40   | 0.40   | 1.00 | 3.59          | EERLVFLGDN                                 |
| 5    | <a href="#">1ajjA</a> | 0.40   | 0.50   | 1.00 | 2.01          | HSSWRC DGGP                                |
| 6    | <a href="#">3bb7A</a> | 0.50   | 0.70   | 0.80 | 1.05          | -HAFVIDGY-                                 |
| 7    | <a href="#">1ajjA</a> | 0.40   | 0.50   | 1.00 | 1.22          | HSSWRC DGGP                                |
| 8    | <a href="#">5hkpC</a> | 0.30   | 0.30   | 1.00 | 2.44          | SPRGCADGRD                                 |
| 9    | <a href="#">2fyIB</a> | 0.50   | 0.50   | 1.00 | 1.90          | NINWRC DNDN                                |
| 10   | <a href="#">1lupA</a> | 0.40   | 0.30   | 1.00 | 1.21          | QKMWTCDEER                                 |

**3. Sequence: KAWVCDGDND (Tau RP1-2)**

| Rank | PDB Hit               | I den1 | I den2 | Cov. | Norm. Z-Score | Sec. Struc. Seq<br>CCSSCCCCC<br>KAWVCDGDND |
|------|-----------------------|--------|--------|------|---------------|--------------------------------------------|
| 1    | <a href="#">7nyc</a>  | 0.60   | 0.60   | 1.00 | 1.01          | KSLVCNGDSD                                 |
| 2    | <a href="#">4zrpC</a> | 0.50   | 0.50   | 1.00 | 2.46          | LTWRCDRDL                                  |
| 3    | <a href="#">1pviA</a> | 0.44   | 0.40   | 0.90 | 1.03          | HAFVIDGAD-                                 |
| 4    | <a href="#">3a7qB</a> | 0.50   | 0.50   | 1.00 | 1.51          | SVWRCDEDDD                                 |
| 5    | <a href="#">6qxfK</a> | 0.40   | 0.40   | 1.00 | 3.33          | ERLVFLGDNY                                 |
| 6    | <a href="#">1ajjA</a> | 0.50   | 0.50   | 1.00 | 2.39          | SSWRC DGGPD                                |
| 7    | <a href="#">3bb7A</a> | 0.62   | 0.50   | 0.80 | 1.02          | -AFVIDGYN-                                 |
| 8    | <a href="#">4zrpC</a> | 0.50   | 0.50   | 1.00 | 1.46          | LTWRCDRDL                                  |
| 9    | <a href="#">5g04S</a> | 0.30   | 0.30   | 1.00 | 2.64          | RAALSDITNS                                 |
| 10   | <a href="#">1v9uA</a> | 0.60   | 0.60   | 1.00 | 2.22          | VSWRC DGEND                                |

**4. Sequence: A WVCDGDND C (TauRP1-3)**

| Rank | PDB Hit               | I den1 | I den2 | Cov. | Norm. Z-Score | Sec. Struc. Seq<br>CCCCCCCCC<br>A WVCDGDND C |
|------|-----------------------|--------|--------|------|---------------|----------------------------------------------|
| 1    | <a href="#">1jrfA</a> | 0.67   | 0.60   | 0.90 | 0.11          | -WLC DGH PDC                                 |
| 2    | <a href="#">7qbdD</a> | 0.60   | 0.60   | 1.00 | 1.45          | TWRCDRDLDC                                   |
| 3    | <a href="#">1n7d</a>  | 0.60   | 0.60   | 1.00 | 1.11          | FWRC D GQVDC                                 |

|    |                       |      |      |      |      |             |
|----|-----------------------|------|------|------|------|-------------|
| 4  | <a href="#">4zrpC</a> | 0.60 | 0.60 | 1.00 | 2.72 | TWRCDRDLDC  |
| 5  | <a href="#">4u8u</a>  | 0.56 | 0.60 | 0.90 | 1.13 | LFVCDGHKD-  |
| 6  | <a href="#">3a7qB</a> | 0.60 | 0.60 | 1.00 | 1.73 | VWRCEDEDDC  |
| 7  | <a href="#">7qbdD</a> | 0.60 | 0.60 | 1.00 | 0.48 | TWRCDGHPDC  |
| 8  | <a href="#">6qxfK</a> | 0.44 | 0.40 | 0.90 | 3.08 | RLVFLGDN-Y- |
| 9  | <a href="#">1f5yA</a> | 0.60 | 0.80 | 1.00 | 0.11 | FWRCDGQVDC  |
| 10 | <a href="#">1n7dA</a> | 0.40 | 0.40 | 1.00 | 0.11 | SRQCDREYDC  |

5. Sequence: **WVCDGDNDCE (TauRP1-4)**

| Rank | PDB Hit               | Iden1 | Iden2 | Cov. | Norm. Z-Score | Sec. Struc. Seq<br>CCCCCCCCC<br>WVCDGDNDCE |
|------|-----------------------|-------|-------|------|---------------|--------------------------------------------|
| 1    | <a href="#">1jrfA</a> | 0.60  | 0.60  | 1.00 | 0.10          | WLCDSGHPDCD                                |
| 2    | <a href="#">7qbdD</a> | 0.60  | 0.60  | 1.00 | 1.79          | WRCDRDLDCS                                 |
| 3    | <a href="#">4u8u</a>  | 0.60  | 0.60  | 1.00 | 0.92          | FVCDGHKDCCH                                |
| 4    | <a href="#">1ajjA</a> | 0.60  | 0.60  | 1.00 | 2.80          | WRCDGGPDCK                                 |
| 5    | <a href="#">4u8u</a>  | 0.67  | 0.60  | 0.90 | 1.10          | FVCDGHKDC-                                 |
| 6    | <a href="#">3a7qB</a> | 0.60  | 0.60  | 1.00 | 1.80          | WRCEDEDDCL                                 |
| 7    | <a href="#">7qbdD</a> | 0.60  | 0.60  | 1.00 | 0.49          | WRCDGHPDCN                                 |
| 8    | <a href="#">1ajjA</a> | 0.60  | 0.60  | 1.00 | 2.77          | WRCDGGPDCK                                 |
| 9    | <a href="#">1f5yA</a> | 0.67  | 0.60  | 0.90 | 0.10          | WRCDGQVDC-                                 |
| 10   | <a href="#">2m0pA</a> | 0.80  | 0.80  | 1.00 | 0.10          | WVCDTDNDG                                  |

6. Sequence: **VCDGDNDCED (Tau RP 1-5)**

| Rank | PDB Hit                | Iden1 | Iden2 | Cov.  | Norm. Z-Score | Sec. Struc. Seq<br>CCCCCCCCC<br>VCDGDNDCED |
|------|------------------------|-------|-------|-------|---------------|--------------------------------------------|
| 1    | <a href="#">7nycB1</a> | 0.60  | 0.60  | 17.20 | <b>1.83</b>   | ECNGENDCGD                                 |
| 2    | <a href="#">4zrpC1</a> | 0.60  | 0.60  | 17.20 | <b>3.10</b>   | RCDRDLDCSD                                 |
| 3    | <a href="#">7qbdD1</a> | 0.60  | 0.60  | 17.20 | <b>1.81</b>   | RCDRDLDCSD                                 |
| 4    | <a href="#">1d2iA</a>  | 0.50  | 0.50  | 14.50 | 0.12          | QCDREYDCKD                                 |
| 5    | <a href="#">6h03C</a>  | 0.70  | 0.70  | 19.90 | 0.44          | LCNGDNDCGD                                 |
| 6    | <a href="#">7nycC</a>  | 0.70  | 0.70  | 19.90 | 0.59          | VNCGDSDCDD                                 |
| 7    | <a href="#">1ajjA</a>  | 0.60  | 0.60  | 17.20 | <b>3.02</b>   | RCDGGPDCKD                                 |
| 8    | <a href="#">1j8eA</a>  | 0.78  | 0.70  | 19.80 | 0.50          | TCGDNDCCG-                                 |
| 9    | <a href="#">7qbdD2</a> | 0.60  | 0.60  | 17.20 | 0.36          | LCDSGHPDCPD                                |
| 10   | <a href="#">3milA</a>  | 0.38  | 0.30  | 8.90  | 0.10          | IFLGANDA--                                 |

7. Sequence: **CDGDNDCEDN (TauRP1-6)**

| Rank | PDB Hit               | Iden1 | Iden2 | Cov. | Norm. Z-Score | Sec. Struc. Seq<br>CCCCCCCCC<br>CDGDNDCEDN |
|------|-----------------------|-------|-------|------|---------------|--------------------------------------------|
| 1    | <a href="#">1n7dA</a> | 0.50  | 0.50  | 1.00 | 0.11          | CDREYDCKDM                                 |
| 2    | <a href="#">7qbdD</a> | 0.60  | 0.60  | 1.00 | 1.93          | CDRDLDCSDG                                 |
| 3    | <a href="#">7nyc</a>  | 0.60  | 0.50  | 1.00 | 1.08          | CNGDSDCDDS                                 |
| 4    | <a href="#">1ajjA</a> | 0.60  | 0.60  | 1.00 | 2.76          | CDGGPDCKDK                                 |
| 5    | <a href="#">3t5oA</a> | 0.67  | 0.70  | 0.90 | 1.03          | CNGENDCGD-                                 |
| 6    | <a href="#">3a7qB</a> | 0.60  | 0.60  | 1.00 | 1.86          | CDEDDDLCDH                                 |
| 7    | <a href="#">7qbdD</a> | 0.70  | 0.70  | 1.00 | 0.51          | CDGHPDCPDN                                 |
| 8    | <a href="#">3iaxB</a> | 0.20  | 0.30  | 1.00 | 2.55          | GDGTGWSSER                                 |
| 9    | <a href="#">2gtlM</a> | 0.60  | 0.60  | 1.00 | 0.11          | CDGEKDCRDG                                 |
| 10   | <a href="#">1jrfA</a> | 0.67  | 0.60  | 0.90 | 0.11          | CDGHPDCDD-                                 |

#### 8. Sequence: DGDNDCEDNS (TauRP1-7)

| Rank | PDB Hit               | Icen1 | Icen2 | Cov. | Norm. Z-Score | Sec. Struc. Seq<br>CCCCCCCCC<br>DGDNDCEDNS |
|------|-----------------------|-------|-------|------|---------------|--------------------------------------------|
| 1    | <a href="#">6qbjA</a> | 0.30  | 0.30  | 1.00 | 0.09          | SGP <b>N</b> KK <b>E</b> SRG               |
| 2    | <a href="#">7qbdD</a> | 0.60  | 0.60  | 1.00 | 1.50          | RD <b>L</b> D <b>C</b> SDGS                |
| 3    | <a href="#">7nyc</a>  | 0.70  | 0.70  | 1.00 | 1.10          | NG <b>E</b> N <b>D</b> C <b>G</b> DNS      |
| 4    | <a href="#">3a7qB</a> | 0.60  | 0.60  | 1.00 | 2.70          | DE <b>D</b> D <b>D</b> CLDH <b>S</b>       |
| 5    | <a href="#">3ojvA</a> | 0.56  | 0.60  | 0.90 | 0.93          | NG <b>D</b> Q <b>D</b> CLDG-               |
| 6    | <a href="#">3a7qB</a> | 0.60  | 0.60  | 1.00 | 1.81          | DE <b>D</b> D <b>D</b> CLDH <b>S</b>       |
| 7    | <a href="#">7qbdD</a> | 0.50  | 0.60  | 1.00 | 0.47          | D <b>G</b> HP <b>D</b> CPDTN               |
| 8    | <a href="#">6tdwT</a> | 0.22  | 0.20  | 0.90 | 2.82          | -NY <b>N</b> FIN <b>N</b> T                |
| 9    | <a href="#">5azaA</a> | 0.30  | 0.40  | 1.00 | 0.11          | KGTGT <b>C</b> SDGN                        |
| 10   | <a href="#">2zaqA</a> | 0.30  | 0.40  | 1.00 | 0.09          | KGTGT <b>C</b> SDGN                        |

#### 9. Sequence: GDNDCEDNSD TauRP (1-8)

| Rank | PDB Hit               | Icen1 | Icen2 | Cov. | Norm. Z-Score | Sec. Struc. Seq<br>CCCCCCCCC<br>GDNDCEDNSD     |
|------|-----------------------|-------|-------|------|---------------|------------------------------------------------|
| 1    | <a href="#">1k7bA</a> | 0.50  | 0.50  | 1.00 | 0.08          | GHP <b>D</b> C <b>D</b> DGRD                   |
| 2    | <a href="#">7qbdD</a> | 0.60  | 0.60  | 1.00 | 1.28          | R <b>D</b> L <b>D</b> C <b>S</b> DG <b>S</b> D |
| 3    | <a href="#">3t5o</a>  | 0.80  | 0.80  | 1.00 | 1.17          | GE <b>N</b> D <b>C</b> GDN <b>S</b> D          |
| 4    | <a href="#">3a7qB</a> | 0.60  | 0.60  | 1.00 | 2.79          | ED <b>D</b> D <b>D</b> CLDH <b>S</b> D         |
| 5    | <a href="#">7nyc</a>  | 0.78  | 0.80  | 0.90 | 0.96          | GE <b>N</b> D <b>C</b> GDN <b>S</b> -          |
| 6    | <a href="#">3a7qB</a> | 0.60  | 0.60  | 1.00 | 1.86          | ED <b>D</b> D <b>D</b> CLDH <b>S</b> D         |
| 7    | <a href="#">7qbdD</a> | 0.60  | 0.60  | 1.00 | 0.46          | GHP <b>D</b> CP <b>D</b> SSD                   |
| 8    | <a href="#">5hkpC</a> | 0.30  | 0.30  | 1.00 | 3.27          | SPRG <b>C</b> ADGRD                            |
| 9    | <a href="#">7nycB</a> | 0.80  | 0.80  | 1.00 | 0.11          | GE <b>N</b> D <b>C</b> GDN <b>S</b> D          |
| 10   | <a href="#">2m96A</a> | 0.40  | 0.50  | 1.00 | 0.08          | GKD <b>D</b> C <b>G</b> NGAD                   |

#### 10. Sequence DNDCEDNSDE TauRP (1-9)

| Rank | PDB Hit                | Icen1 | Icen2 | Cov.  | Norm. Z-Score | Sec. Struc. Seq<br>CCCCCCCCC<br>DNDCEDNSDE |
|------|------------------------|-------|-------|-------|---------------|--------------------------------------------|
| 1    | <a href="#">7nycB1</a> | 0.80  | 0.80  | 22.60 | <b>1.22</b>   | EN <b>D</b> C <b>G</b> DNS <b>D</b> E      |
| 2    | <a href="#">3a7qB</a>  | 0.70  | 0.70  | 19.90 | <b>2.72</b>   | DD <b>D</b> CLDH <b>S</b> D <b>E</b>       |
| 3    | <a href="#">7qbdD1</a> | 0.70  | 0.70  | 19.90 | <b>1.09</b>   | LD <b>L</b> CS <b>D</b> GS <b>D</b> E      |
| 4    | <a href="#">5xnll</a>  | 0.30  | 0.30  | 9.10  | 0.09          | SN <b>D</b> PGR <b>N</b> PGR               |
| 5    | <a href="#">7nycB</a>  | 0.80  | 0.80  | 22.60 | 0.42          | EN <b>D</b> C <b>G</b> DNS <b>D</b> E      |
| 6    | <a href="#">3t5oA</a>  | 0.80  | 0.80  | 22.60 | 0.67          | EN <b>D</b> C <b>G</b> DNS <b>D</b> E      |
| 7    | <a href="#">2fvlB2</a> | 0.90  | 0.90  | 25.30 | <b>2.64</b>   | DN <b>D</b> C <b>G</b> DNS <b>D</b> E      |
| 8    | <a href="#">3a7qB</a>  | 0.67  | 0.60  | 17.10 | 0.48          | DD <b>D</b> CLDH <b>S</b> D-               |
| 9    | <a href="#">7qbdD2</a> | 0.60  | 0.60  | 17.20 | 0.33          | HP <b>D</b> CP <b>D</b> SS <b>D</b> E      |
| 10   | <a href="#">7ojjL</a>  | 0.50  | 0.50  | 14.50 | 0.12          | AN <b>G</b> CE <b>H</b> NS <b>D</b> E      |

#### 11. Sequence NDCEDNSDEE – TauRP (1-10)

| Rank | PDB Hit               | Icen1 | Icen2 | Cov. | Norm. Z-Score | Sec. Struc. Seq<br>CCCCCCCCC<br>NDCEDNSDEE    |
|------|-----------------------|-------|-------|------|---------------|-----------------------------------------------|
| 1    | <a href="#">2jm4A</a> | 0.40  | 0.40  | 1.00 | 0.10          | D <b>D</b> C <b>G</b> NQA <b>D</b> E <b>D</b> |
| 2    | <a href="#">7nycB</a> | 0.80  | 0.80  | 1.00 | 1.16          | ND <b>C</b> GDN <b>S</b> DER                  |
| 3    | <a href="#">3t5o</a>  | 0.80  | 0.80  | 1.00 | 1.14          | ND <b>C</b> GDN <b>S</b> DER                  |
| 4    | <a href="#">3a7qB</a> | 0.60  | 0.60  | 1.00 | 2.76          | DD <b>D</b> CLDH <b>S</b> DE <b>D</b>         |
| 5    | <a href="#">5f0eA</a> | 0.56  | 0.50  | 0.90 | 0.70          | CD <b>C</b> CDGT <b>D</b> E-                  |
| 6    | <a href="#">3a7qB</a> | 0.60  | 0.60  | 1.00 | 1.93          | DD <b>D</b> CLDH <b>S</b> DE <b>D</b>         |
| 7    | <a href="#">7qbdD</a> | 0.60  | 0.60  | 1.00 | 0.45          | PD <b>D</b> CP <b>D</b> SS <b>D</b> EN        |
| 8    | <a href="#">5hkpC</a> | 0.30  | 0.30  | 1.00 | 3.33          | RG <b>C</b> ADGRD <b>A</b> D                  |
| 9    | <a href="#">1f5vA</a> | 0.56  | 0.50  | 0.90 | 0.12          | -D <b>C</b> DN <b>G</b> S <b>D</b> E <b>Q</b> |
| 10   | <a href="#">2m96A</a> | 0.50  | 0.50  | 1.00 | 0.09          | D <b>D</b> C <b>G</b> NGA <b>D</b> E <b>E</b> |

## 12. Sequence DCEDNSDEEN – TauRP (1-11)

| Rank | PDB Hit               | Icen1 | Icen2 | Cov. | Norm. Z-Score | Sec. Struc. Seq<br>CCCCCCCCC<br>DCEDNSDEEN                    |
|------|-----------------------|-------|-------|------|---------------|---------------------------------------------------------------|
| 1    | <a href="#">7nycB</a> | 0.70  | 0.70  | 1.00 | 1.07          | D <b>C</b> G <b>D</b> <b>N</b> S <b>D</b> E <b>R</b> D        |
| 2    | <a href="#">3t5o</a>  | 0.70  | 0.70  | 1.00 | 1.10          | D <b>C</b> G <b>D</b> <b>N</b> S <b>D</b> E <b>R</b> D        |
| 3    | <a href="#">3a7qB</a> | 0.60  | 0.60  | 1.00 | 2.91          | D <b>C</b> L <b>D</b> H <b>S</b> D <b>E</b> D <b>D</b>        |
| 4    | <a href="#">5w4kA</a> | 0.30  | 0.30  | 1.00 | 2.13          | N <b>A</b> S <b>S</b> <b>N</b> S <b>A</b> S <b>A</b> <b>N</b> |
| 5    | <a href="#">5hkpC</a> | 0.33  | 0.30  | 0.90 | 2.98          | G <b>C</b> <b>A</b> D <b>G</b> R <b>D</b> A <b>D</b> -        |
| 6    | <a href="#">7kx0D</a> | 0.20  | 0.30  | 1.00 | 1.07          | H <b>C</b> <b>N</b> S <b>G</b> L <b>L</b> V <b>R</b> <b>N</b> |
| 7    | <a href="#">7nyc</a>  | 0.70  | 0.80  | 1.00 | 1.10          | D <b>C</b> G <b>D</b> <b>N</b> S <b>D</b> E <b>R</b> D        |
| 8    | <a href="#">5w4kA</a> | 0.30  | 0.30  | 1.00 | 2.72          | N <b>A</b> S <b>S</b> <b>N</b> S <b>A</b> S <b>A</b> <b>N</b> |
| 9    | <a href="#">3a7qB</a> | 0.60  | 0.60  | 1.00 | 1.96          | D <b>C</b> L <b>D</b> H <b>S</b> D <b>E</b> D <b>D</b>        |
| 10   | <a href="#">1uf2K</a> | 0.44  | 0.40  | 0.90 | 2.65          | - <b>S</b> E <b>P</b> F <b>S</b> D <b>K</b> E <b>R</b>        |

## 13. Sequence CEDNSDEENC – TauRP (1-12)

| Rank | PDB Hit                | Icen1 | Icen2 | Cov.  | Norm. Z-Score | Sec. Struc. Seq<br>CCCCCCCCC<br>CEDNSDEENC             |
|------|------------------------|-------|-------|-------|---------------|--------------------------------------------------------|
| 1    | <a href="#">7nycB1</a> | 0.70  | 0.70  | 19.90 | <b>1.09</b>   | C <b>G</b> D <b>N</b> S <b>D</b> E <b>R</b> D <b>C</b> |
| 2    | <a href="#">3a7qB</a>  | 0.60  | 0.60  | 17.20 | <b>2.76</b>   | C <b>L</b> D <b>H</b> S <b>D</b> E <b>D</b> D <b>C</b> |
| 3    | <a href="#">7pg0A6</a> | 0.30  | 0.30  | 9.10  | <b>1.07</b>   | C <b>S</b> Q <b>P</b> D <b>D</b> P <b>T</b> K <b>C</b> |
| 4    | <a href="#">2m96A</a>  | 0.60  | 0.60  | 17.20 | 0.11          | C <b>G</b> N <b>G</b> A <b>D</b> E <b>E</b> N <b>C</b> |
| 5    | <a href="#">7nycB</a>  | 0.70  | 0.70  | 19.90 | 0.39          | C <b>G</b> D <b>N</b> S <b>D</b> E <b>R</b> D <b>C</b> |
| 6    | <a href="#">7nycB</a>  | 0.70  | 0.70  | 19.90 | 0.64          | C <b>G</b> D <b>N</b> S <b>D</b> E <b>R</b> D <b>C</b> |
| 7    | <a href="#">1aijA</a>  | 0.80  | 0.80  | 22.60 | <b>2.67</b>   | C <b>K</b> D <b>K</b> S <b>D</b> E <b>E</b> N <b>C</b> |
| 8    | <a href="#">1aijA</a>  | 0.78  | 0.70  | 19.80 | 0.64          | C <b>K</b> D <b>K</b> S <b>D</b> E <b>E</b> N-         |
| 9    | <a href="#">7qbdD2</a> | 0.60  | 0.60  | 17.20 | 0.36          | C <b>P</b> D <b>S</b> S <b>D</b> E <b>L</b> G <b>C</b> |
| 10   | <a href="#">3oijB1</a> | 0.70  | 0.70  | 19.90 | 0.12          | C <b>G</b> D <b>Q</b> S <b>D</b> E <b>A</b> N <b>C</b> |

## 14. Sequence EDNSDEENCE – TauRP (1-13)

| Rank | PDB Hit                | Icen1 | Icen2 | Cov.  | Norm. Z-Score | Sec. Struc. Seq<br>CCCCCCCCC<br>EDNSDEENCE             |
|------|------------------------|-------|-------|-------|---------------|--------------------------------------------------------|
| 1    | <a href="#">7pg0A6</a> | 0.20  | 0.20  | 6.40  | <b>1.16</b>   | S <b>Q</b> P <b>D</b> <b>D</b> P <b>T</b> K <b>C</b> V |
| 2    | <a href="#">2fylB2</a> | 0.60  | 0.60  | 17.20 | <b>2.41</b>   | G <b>D</b> <b>N</b> S <b>D</b> E <b>A</b> G <b>C</b> S |
| 3    | <a href="#">1uf2k</a>  | 0.50  | 0.50  | 14.50 | <b>2.94</b>   | E <b>P</b> F <b>S</b> D <b>K</b> E <b>R</b> S <b>E</b> |
| 4    | <a href="#">7nycB1</a> | 0.60  | 0.60  | 17.20 | 0.97          | G <b>D</b> <b>N</b> S <b>D</b> E <b>R</b> D <b>C</b> G |
| 5    | <a href="#">2im4A</a>  | 0.44  | 0.40  | 11.70 | 0.07          | G <b>N</b> Q <b>A</b> E <b>D</b> N <b>C</b> -          |
| 6    | <a href="#">6h04D</a>  | 0.60  | 0.60  | 17.20 | 0.35          | E <b>D</b> S <b>A</b> E <b>D</b> R <b>C</b> E          |
| 7    | <a href="#">3t5oA</a>  | 0.60  | 0.60  | 17.20 | 0.60          | G <b>D</b> <b>N</b> S <b>D</b> E <b>R</b> D <b>C</b> G |
| 8    | <a href="#">3a7qB</a>  | 0.56  | 0.50  | 14.40 | <b>2.18</b>   | L <b>D</b> H <b>S</b> D <b>E</b> D <b>D</b> C-         |
| 9    | <a href="#">3a7qB</a>  | 0.56  | 0.50  | 14.40 | 0.50          | L <b>D</b> H <b>S</b> D <b>E</b> D <b>D</b> C-         |
| 10   | <a href="#">6ae8c</a>  | 0.44  | 0.40  | 11.70 | <b>2.48</b>   | - <b>D</b> E <b>D</b> E <b>E</b> D <b>D</b> D          |

## 15. Sequence DNSDEENCES – TauRP (1-14)

| Rank | PDB Hit               | Icen1 | Icen2 | Cov. | Norm. Z-Score | Sec. Struc. Seq<br>CCCCHHCCCC<br>DNSDEENCES            |
|------|-----------------------|-------|-------|------|---------------|--------------------------------------------------------|
| 1    | <a href="#">1n7dA</a> | 0.50  | 0.50  | 1.00 | 0.08          | D <b>M</b> S <b>D</b> E <b>V</b> G <b>C</b> V <b>N</b> |
| 2    | <a href="#">7jpmA</a> | 0.30  | 0.30  | 1.00 | 1.05          | C <b>K</b> S <b>D</b> D <b>D</b> C <b>P</b> R          |
| 3    | <a href="#">3t5o</a>  | 0.60  | 0.90  | 1.00 | 1.04          | D <b>N</b> S <b>D</b> E <b>R</b> D <b>C</b> G <b>R</b> |
| 4    | <a href="#">1n7dA</a> | 0.50  | 0.50  | 1.00 | 1.94          | D <b>M</b> S <b>D</b> E <b>V</b> G <b>C</b> V <b>N</b> |
| 5    | <a href="#">2fylA</a> | 0.44  | 0.50  | 0.90 | 1.00          | D <b>R</b> S <b>D</b> E <b>S</b> A <b>S</b> C-         |
| 6    | <a href="#">1cr8A</a> | 0.60  | 0.60  | 1.00 | 1.56          | D <b>S</b> S <b>D</b> E <b>K</b> S <b>C</b> E <b>G</b> |
| 7    | <a href="#">7qbdD</a> | 0.50  | 0.50  | 1.00 | 0.45          | D <b>S</b> S <b>D</b> E <b>L</b> G <b>C</b> T <b>N</b> |
| 8    | <a href="#">6ae8C</a> | 0.40  | 0.40  | 1.00 | 3.13          | D <b>D</b> E <b>D</b> E <b>E</b> D <b>D</b> D <b>F</b> |
| 9    | <a href="#">1jrfA</a> | 0.40  | 0.50  | 1.00 | 0.12          | D <b>G</b> R <b>D</b> E <b>W</b> G <b>C</b> G <b>T</b> |
| 10   | <a href="#">2i1pA</a> | 0.60  | 0.60  | 1.00 | 0.07          | D <b>N</b> S <b>D</b> E <b>A</b> G <b>C</b> P <b>T</b> |

Those residues in template which are identical to the residue in the query sequence are highlighted in color. Polar residues are bright colored while non-polar residues are colored darker. Ident1 indicates the % sequence identity of templates in the threading aligned region with

the query sequence while Ident2 is the % sequence identity of the whole template chains with query sequence. Cov is the coverage of the threading alignment and is equal to the number of aligned residues divided by length of query protein. Norm. Z. Score = Z-score of the threading alignments. The top 10 alignments reported (in order of their ranking) are mostly from the following threading programs and are shown for each of the sequences below. 1: FFAS-3D 2: SPARKS-X 3: HHSEARCH2 4: Neff-PPAS 5: HHSEARCH 6: pGenTHREADER 7: wdPPAS 8: PROSPECT2 9: SP3 10: FFAS03. (<https://zhanggroup.org/I-TASSER/>).

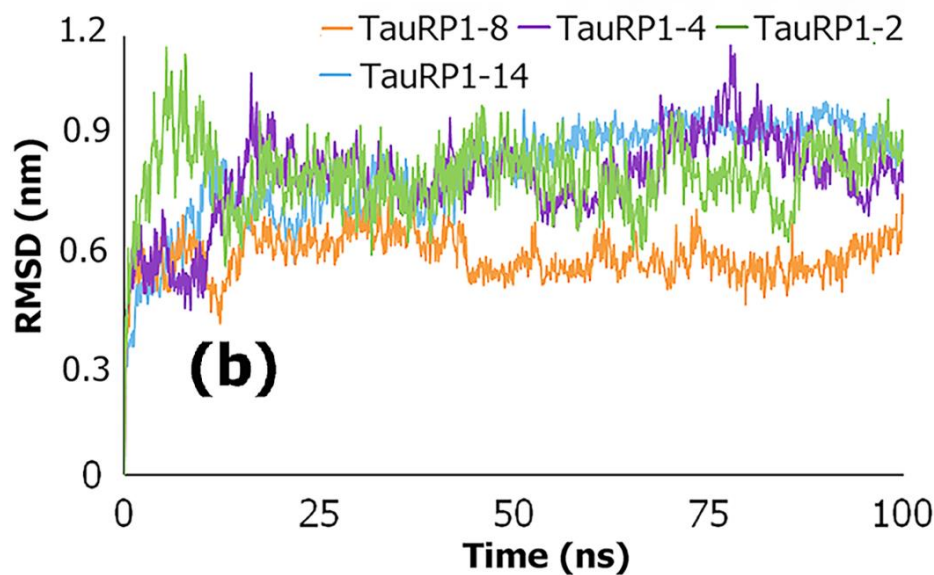

**Figure S1.** Comparison of RMSDs of peptide bound complexes with PHF Tau over 100 ns simulations.

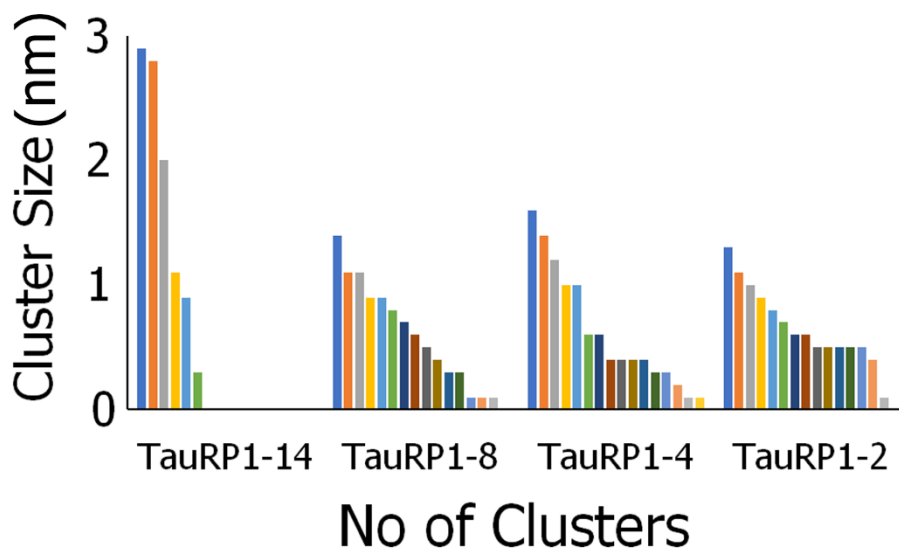

**Figure S2.** Comparison of size and number of clusters formed for TauRP (1-2); TauRP (1-4); TauRP (1-8) and TauRP (1-14) based on clustering results obtained from the trajectory images of the last 25 ns of 100 ns MD simulations upon binding to PHF Tau calculated from the RMSD matrices.



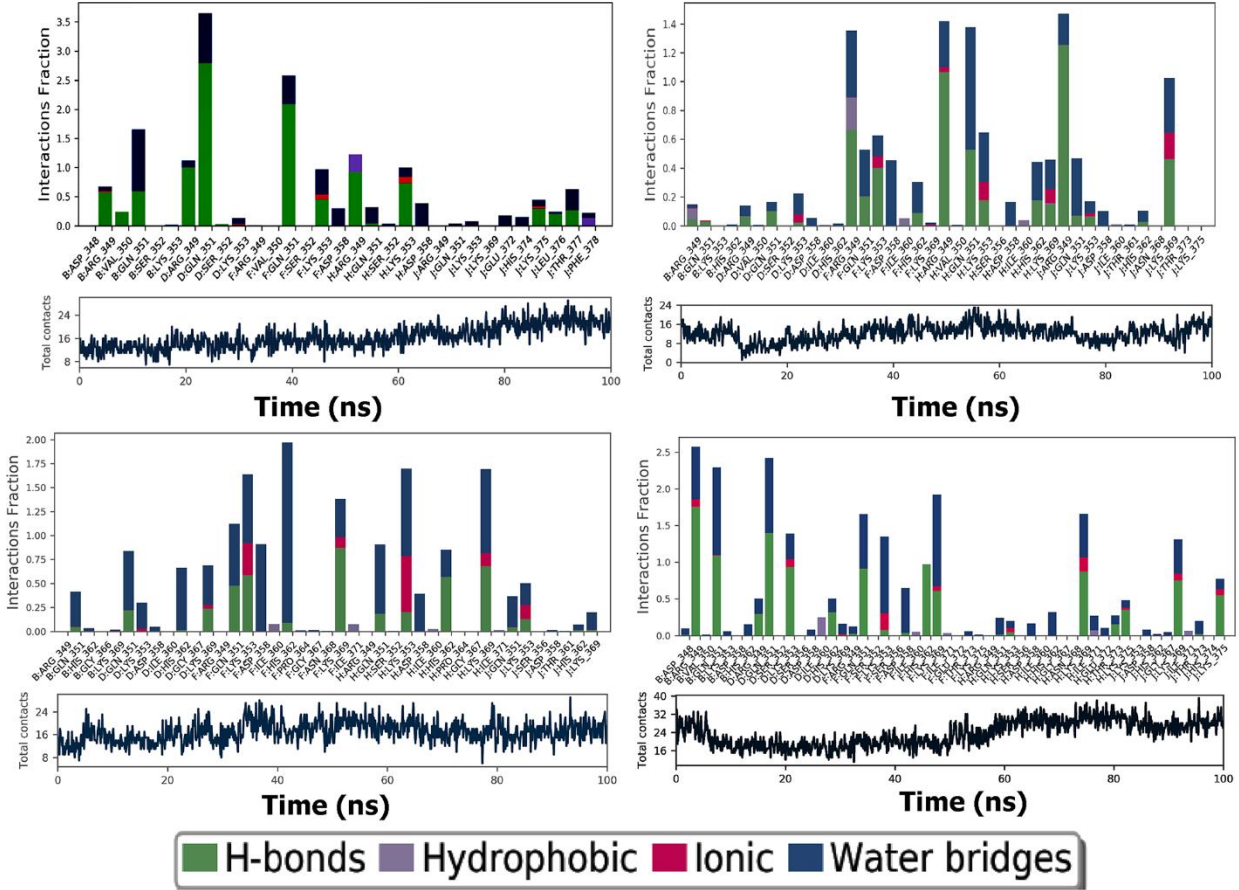

**Figure S3.** Protein-ligand contacts over 100 ns simulations between PHF Tau and top row (left) Tau (RP1-2) with total contacts; top row (right) Tau (RP1-4) with total contacts; Bottom row (left) Tau (RP1-8) with total contacts; Bottom row (right) TauRP 1-14 and total contacts.



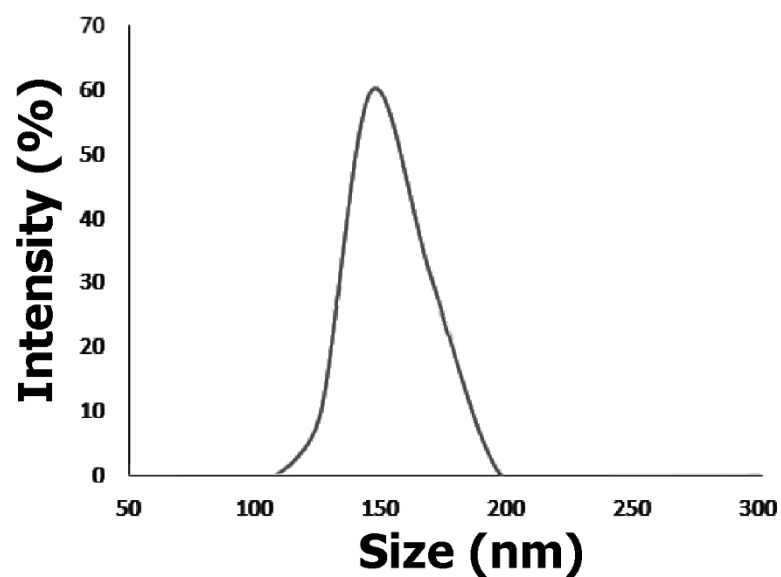

**Figure S4.** DLS analysis showing the formation of fibrillar Tau aggregates in the size range of 100 to 200 nm.

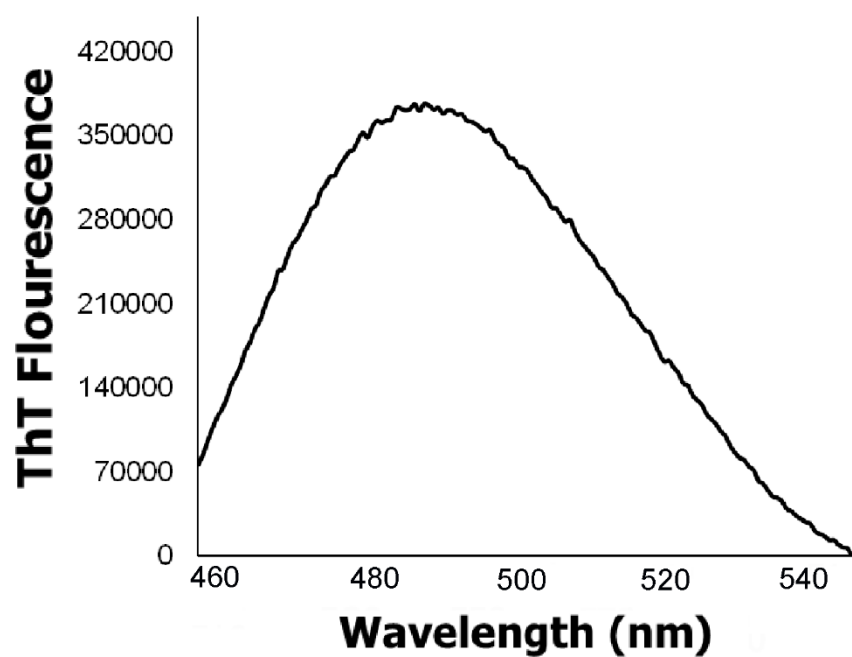

**Figure S5.** Emission spectrum ThT bound to fibrillar tau aggregates at excitation of 450 nm.
